# Supplementary material for: ClonalFrameML: Efficient Inference of Recombination in Whole Bacterial Genomes
Source: PubMed Central journal article supplement (PMC4326465; doi:10.1371/journal.pcbi.1004041), 2015-02-12

$R/\theta$  $\delta$  $v$  $r/m$ 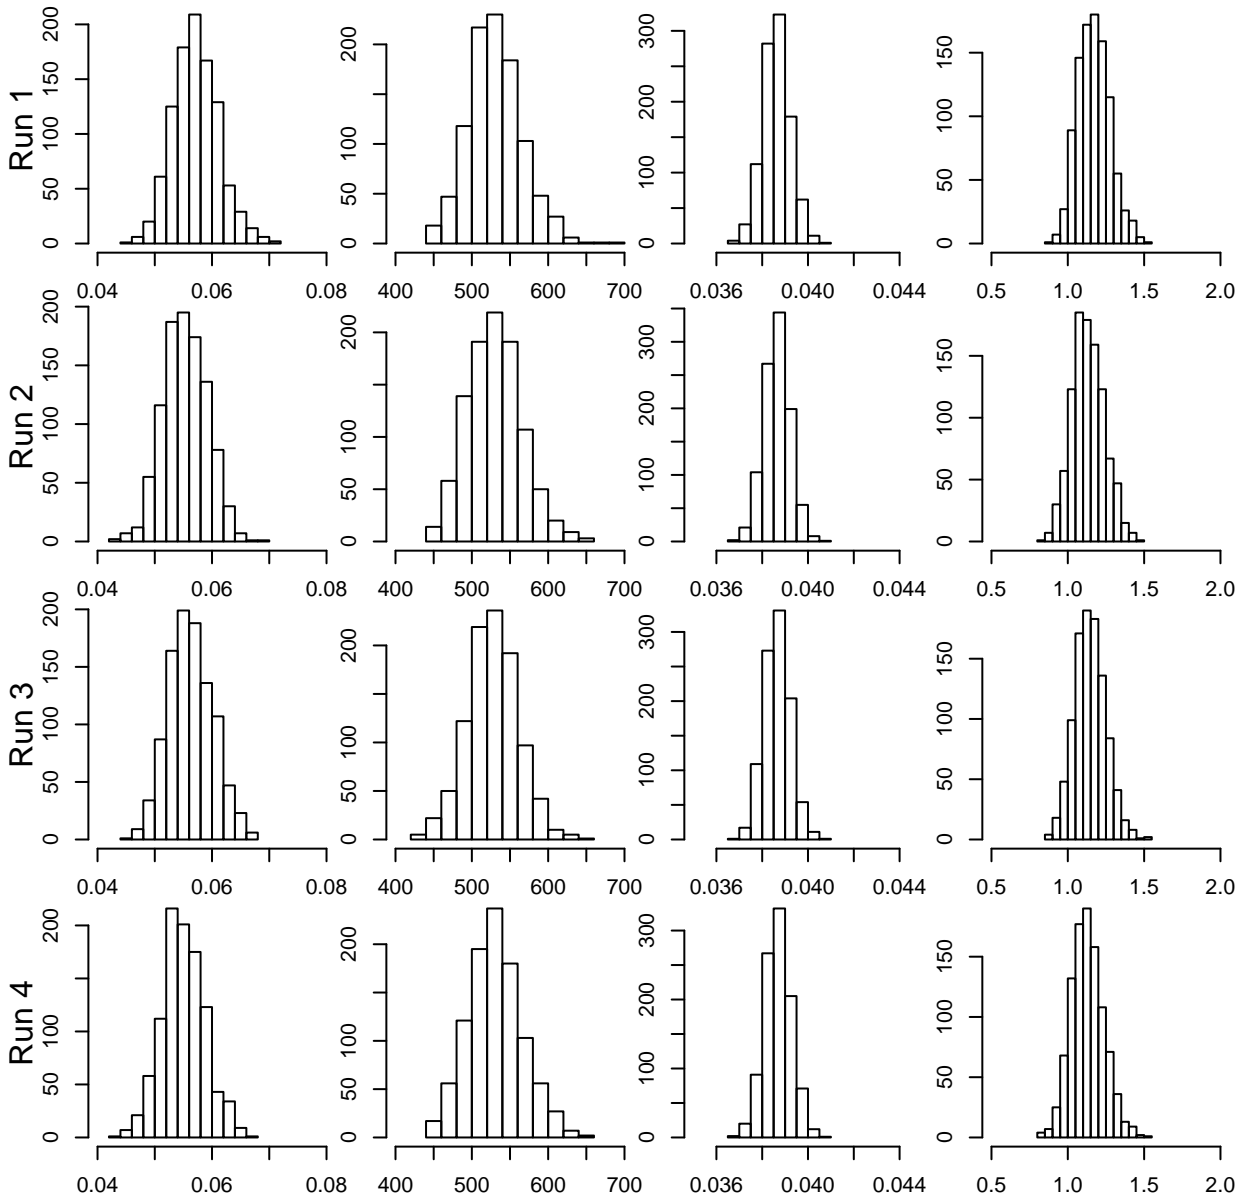

Supplement: pcbi.1004041.s001.pdf [file pcbi.1004041.s001.pdf]
