# Supplementary material for: ClonalFrameML: Efficient Inference of Recombination in Whole Bacterial Genomes
Source: PubMed Central journal article supplement (PMC4326465; doi:10.1371/journal.pcbi.1004041), 2015-02-12

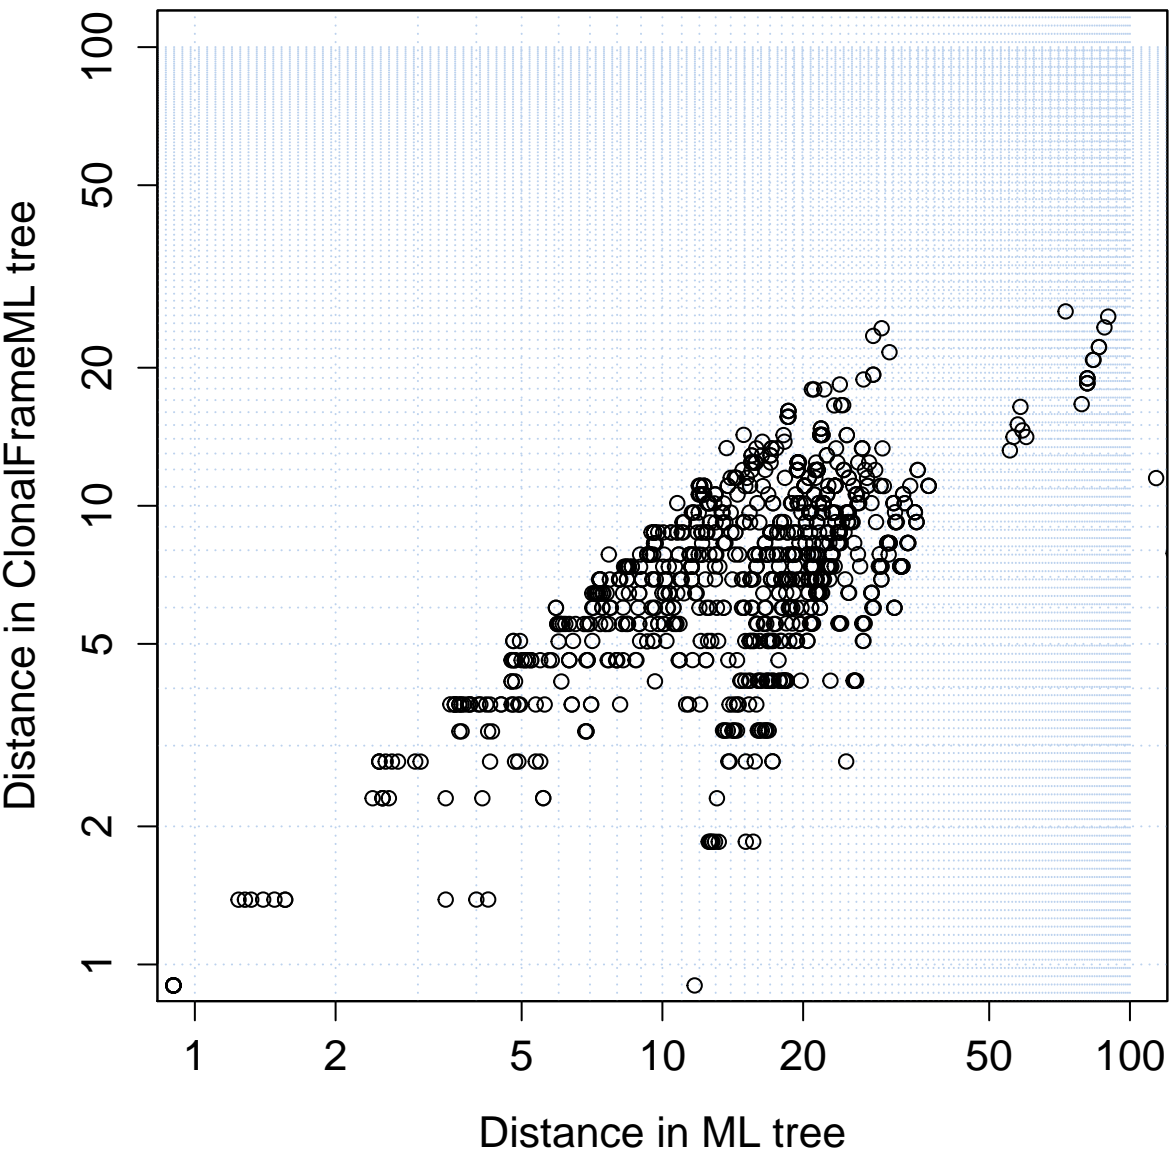

Supplement: pcbi.1004041.s004.pdf [file pcbi.1004041.s004.pdf]
