# Supplementary material for: ClonalFrameML: Efficient Inference of Recombination in Whole Bacterial Genomes
Source: PubMed Central journal article supplement (PMC4326465; doi:10.1371/journal.pcbi.1004041), 2015-02-12
Supplement: pcbi.1004041.s005.pdf [file pcbi.1004041.s005.pdf]

- Ancestral allele
- Derived allele

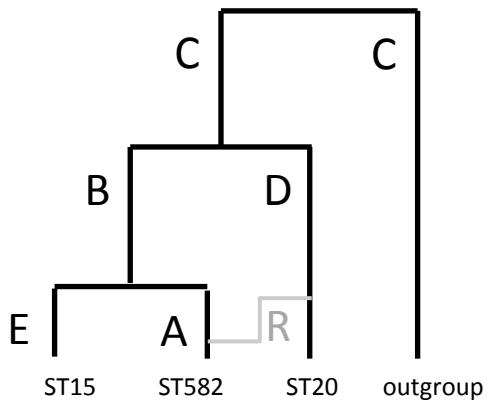

Clonal sites

|   | ST15 | ST582 | ST20 | outgroup |   |
|---|------|-------|------|----------|---|
| ● | ●    | ●     | ●    | ●        | A |
| ● | ●    | ●     | ●    | ●        | B |
| ● | ●    | ●     | ●    | ●        | C |
| ● | ●    | ●     | ●    | ●        | D |
| ● | ●    | ●     | ●    | ●        | E |

Recombined sites

|   |   |   |   |                                        |
|---|---|---|---|----------------------------------------|
| ● | ● | ● | ● | (D+R) interpreted as D & A (homoplasy) |
| ● | ● | ● | ● | (B+R) interpreted as E (mirroring)     |
